# Supplementary material for: Qingre Huoxue decoction and its active compound Quercetin modulate bone remodeling by inhibiting ATF4 hyperactivation to attenuate bone erosion in rheumatoid arthritis
Source: Research Square preprint supplement (doi:10.21203/rs.3.rs-7314345/v1), 2025-08-13
Supplement: Supplementary file 1 [file a221c9167dbd986e9e9804f0.xlsx]

## Sheet: QRHXD
Compounds	Number of known target proteins	Name of known target proteins
Resveratrol	368	CYP19A1, DES, XIAP, NPHS2, CEBPA, MIR15A, RAPGEF3, PIK3CD, FXN, CDK6, TGFA, BTK, KCNA5, TNFSF10, MCL1, SIRT3, PON1, BAD, SMAD2, , BRCA2, DNM1L, APOM, GSK3B, G3BP1, HSPB1, CRTC1, LRRFIP1, HMGB1, TFAM, SCN5A, SELP, KHDRBS1, SIRT7, LMNA, YARS2, JUN, CYTB, MIR183, SQSTM1, APOE, MAPK7, STXBP1, HMGCR, BDNF, MMP10, , FASN, CPT1A, FOXC2, IRS1, AR, UCP1, CDH2, PIK3CG, CD28, ACHE, XDH, MAPK8, NQO1, EIF2AK3…
Curcumin	300	LGR5, CYP19A1, DNAJB4, PRDX6, CCL2, KDR, IL13, LDLR, XIAP, S100A8, IL18, CEBPA, CDX2, CCNB1, PIAS1, PPP1R1B, CYP1A1, CTGF, PIK3CA, CLDN4, MIR15A, MAOB, DNMT1, GABPA, LRRK2, IL2, CASP9, IL9, MCL1, TNFRSF10A, , CD36, CYP4F3, PPP1R1A, ATP8A2, BAD, PIAS3, CD68, SMAD2, AREG, HDAC1, SERPINE1, HSPB1, OLR1, EGR1, SELP, POLG, ITGAM, SOX9, PRKAA1, TJP1, ULK1, JUN, PI4KB, SQSTM1, MYC, MAPK9, MMP2, SREBF1, B…
Quercetin	215	GAA, TXN, CD40LG, CCL2, LDLR, GABRR3, EGF, SLPI, CCNB1, PRKCA, PLAT, CYP1A1, PIK3CA, CLDN4, COMT, IL2, CASP9, MCL1, AURKB, POR, PON1, AXIN1, GSK3B, SERPINE1, HSPB1, E2F2, KHK, CRTC1, HNRNPA1, NDUFV2, DNAJC5, EGR1, PRKAA1, CRH, TJP1, THBS1, JUN, MYC, MMP2, APOE, CTSD, LPCAT1, BDNF, CYP2C8, FASN, USP10, ELK1, CPT1A, CAT, PGP, HIF1A, AR, NR1I3, MAP3K5, ACHE, CDKN2A, IRF1, XDH, MAPK8, CLDN5, SLC2A4, …
Dioscin	112	CASP3, KDR, PNPLA2, CEBPA, SIRT2, MAPK14, BECN1, CDK5, PCNA, CTNNB1, MITF, NFKB1, TLR4, MIR34A, SIRT6, HSPA5, CASP9, LRP5, VEGFA, NFATC1, LCP1, CRK, CYBA, GSK3B, MAPK13, VCAM1, TNFRSF11B, SMAD1, PPARGC1A, BMI1, HMGB1, FOXO1, PRKAA1, CYCS, JUN, TIGAR, MMP2, MAPK9, SREBF1, BCL2, NOX4, POLDIP2, ESR2, CTSK, MAP1LC3A, MIRLET7I, FAS, HIF1A, NFKBIA, EREG, KRT18, ESR1, SFN, EGLN1, PKD1, MAPK8, TRAF6, NQO…
Caffeine	97	RYR1, ZFHX3, SIRT3, LHB, PDE6C, ACHE, RELA, MEF2D, ADORA2B, BAX, NEK11, CDKN1A, ITPR2, PDE1A, CTNNB1, ITGB3, ATR, SLC2A1, TP53, TYR, IER5, AKT1, PTGS2, PRKDC, E2F1, NPS, PIK3CA, PRKAA1, BCL2L11, ADORA3, PDE11A, PDE4D, PDE7B, ITPR3, INS, SNCA, FOS, ABCB1, PDE7A, ATM, GABRR1, ORAI1, ADIPOQ, DRD2, PDE5A, GABRA2, PDE9A, ARC, MAPK1, PDE4B, PDE2A, PDE1B, PIK3CD, TFAM, JUN, ADORA2A, BDNF, RYR2, ITPR1, S…
Berberine	96	SLC22A2, CASP3, TXN, ID1, SLC22A3, MTOR, RET, RXRA, TP53, CDKN1A, CCNB1, MAPK14, BECN1, CTNNB1, CDH1, IKBKB, NFKB1, DNMT3B, POU2F2, MMP13, CRP, DNMT1, SLC22A1, CYBB, SIRT1, MYLK3, GSK3A, AKT1, PPARG, CDK4, HSPA5, MIR21, RRM2, EZR, MMP1, MCL1, VEGFA, PON1, CDK1, INS, CYP2E1, PTGS2, MMP3, DNM1L, PPP2R4, CCNA1, SCARB1, PRKAA2, EFNB2, MMP9, HMGB1, MIR93, OLR1, CYP2J2, BACE1, PRKAA1, RRM1, LIG1, MLC1,…
Emodin	86	CASP3, KDR, ABCB11, EGF, NAT10, AQP1, SLPI, PTP4A3, CYP1A1, CTNNB1, NFKB1, ATRNL1, MAOB, TLR4, PPARG, BTK, HSPA5, TNFSF10, NFATC1, PRKAA2, SARS, RUNX2, EGR1, PRKAA1, FLT4, MYC, ALPL, BCL2, CSNK2A2, ASRGL1, CCL27, FXR1, ROS1, MIR371A, HIF1A, AR, ESR1, NOS2, CLDN5, MTA3, SLC2A4, MTOR, SLC2A1, TP53, IL1B, CDH1, PPP1R14A, TWIST1, KIT, SIRT1, AKT1, BGLAP, MMP1, VIM, SMAD3, JAK1, PDLIM3, CYP1A2, FLT1, …
Luteolin	83	MAPK8, CASP3, SLC2A4, MTOR, LPCAT2, XIAP, TP53, TYR, ERBB2, CDKN1A, BCL2L1, CCNB1, FLT3, MAPK14, HMOX1, CCND1, MDM2, NFKB1, MET, ZHX2, IFNG, MYLK3, MIR132, AKT1, PARP1, CDK4, CASP9, MMP1, MCL1, ABCC2, AURKB, IL10, VEGFA, SIRT3, SMAD3, PTGS2, CLDN2, MAOA, GAK, VRK1, MAPK1, PTN, MMP9, HMGB1, MIR384, IL4, ABCG2, SRC, ANO1, ICAM1, HDAC9, PRKCE, JUN, TOP2A, GSTK1, ADORA1, MMP2, ADORA2A, BCL2, HSP90AA1…
Ursolic Acid	78	GAA, CASP3, AMY1A, XIAP, CDKN1A, ABAT, CCNE1, CTNNB1, NFKB1, CDK6, PPARG, SELE, CDK4, CASP9, MCL1, VEGFA, MMP3, VCAM1, NR1I2, NR1H3, UGT1A3, JUN, GAP43, MMP2, BCL2, CCND2, CASP1, NOX4, NOS3, KLK5, MMP10, FASN, FAS, NFKBIA, S100A1, CDK2, JAK3, ESR1, ACHE, NOS2, TP53, BCL2L1, IL1B, MUC5AC, CCND1, TWIST1, CASP8, ATF2, RELA, AKT1, PTPN6, MMP1, PTGS2, ATP1A1, PRKCZ, MAPK1, MMP9, UGT1A1, BACE1, CTSB, P…
Cholesterol	69	LAMP1, LDLR, AQP1, SREBF2, PCSK9, LAMP2, LRP1, PON1, MIR122, LY96, CRTC1, ATP2A3, CAV3, TSPO, CASP1, HMGCR, HIF1A, SGMS2, NR1I3, ESRRA, CYP46A1, APP, RORA, CDH1, SNX8, CRISP2, COG2, NPC1, VDR, PRKCB, ACE, BACE1, MIR33A, IL4, APOB, ECB2, NOTCH1, MPP1, MIR145, GPR55, CD81, DDIT3, ABCF3, MIR33B, NFKB1, STAR, AQP8, CAV1, NKX2-5, NUS1, MIR185, NPC1L1, SCP2, ABCG5, CLEC4E, IL1B, HULC, SMO, PLP1, SIRT1,…
3beta-Hydroxyurs-12-En-28-Syre	69	CASP3, NOP2, CCL2, CEBPA, CDKN1A, MAPK14, CTNNB1, PMAIP1, NFKB1, IGF1, PIK3CA, PIK3CD, DNMT1, IGFBP1, LRRK2, CASP9, EZR, MCL1, VEGFA, TRIM63, WDR12, BBC3, CYCS, CFLAR, TCF4, MAPK9, BCL2, NOX4, MSTN, KRAS, MAP2K2, EGFR, NFKBIA, PIK3CG, EP300, MAPK8, MTOR, TP53, EIF2AK3, MAP2K1, CHUK, BCL2L1, CCND1, RRN3, IKBKB, FBXW7, CASP8, RELA, AKT1, SYP, INS, PTGS2, MAPK1, MMP9, BRAF, FOXO3, ICAM1, EZH2, STAT3…
VITAMIN E	69	TXN, PPP2CB, PRKCA, CYP1A1, FBXO32, PIGK, CASP9, TRIM63, GSK3B, SERPINE1, SOD3, JUN, MYC, LEP, HMGCR, PLA2G2A, CAT, COL1A2, ACHE, CDKN2A, PLA2G4A, SLC2A4, SEC14L3, ALOX5, CDH1, CDKN1B, RELA, CASP12, CYP2E1, PPP2CA, PRKCB, NR3C2, IL4, ICAM1, FOS, SEC14L4, ABCB1, CCR5, CASP3, CD86, GGT5, F3, NFKB1, SOD1, SELE, VEGFA, ODC1, SEC14L2, PON3, VCAM1, MT3, NR1I2, CAPN1, IGF1R, GPT, NFKBIA, NOS2, MME, SOD2…
Rottlerin	69	PLA2G4A, KCNMB1, PRKAB1, CASP3, MTOR, CD86, KDR, XIAP, SOD2, BCL2L1, BECN1, CCND1, CACNA1C, MITF, PIK3CA, PIK3CD, TGM2, RELA, CDK6, AKT1, PARP1, BIRC3, BGLAP, HSPA5, SLC26A6, ATG12, VEGFA, KCNH2, ODC1, SMAD3, PTGS2, ATG7, VCAM1, ATG5, MAPK1, CRTC1, PRKAA2, MMP9, NKX3-1, MACC1, ITGAM, PRKAA1, CRTC3, NFAT5, MMP2, CCND3, PRKCD, BAX, BCL2, CREB1, MT2A, PLSCR1, COL11A2, KCNMA1, PIK3R1, MAP1LC3A, PIK3C…
Daidzein	68	EP300, GAA, ADH4, CASP3, CYP2C9, LDLR, SOD2, TP53, CDKN1A, BARD1, ARG1, CYP1A1, SLC16A2, ECE1, RELA, MKI67, SLC52A1, CAV1, VEGFA, PTGS2, FCER2, STAT1, PTK2B, VCAM1, HSD3B1, MAPK1, ABCA1, NR1I2, MMP9, MTTP, CYP21A2, GABBR1, IL4, SCD, CYCS, HSD3B2, APOB, SRC, ICAM1, JUN, IGF1R, PRKCD, GHR, MMP2, BAX, APOE, NOS3, TNF, BDNF, MT2A, ALDH2, RHOA, CRYZ, BAP1, ESR2, CPT1A, FOS, CYP3A4, ADH1C, TFF1, CAT, G…
Wogonin	62	CASP3, CCL2, KDR, SLC2A1, TP53, CHUK, CDKN1A, IL1B, MUC5AC, F3, CCND1, CCL26, MDM2, CTNNB1, COL2A1, IKBKB, NFKB1, CDKN1B, MMP13, RELA, PARP1, AKT1, CDK4, CASP9, MMP1, MCL1, VEGFA, PTGS2, MMP3, CYP1A2, CXCL8, ERN1, GSK3B, BBC3, MAPK1, MMP9, FN1, TRAF2, NEDD4L, CFLAR, JUN, RB1, SPP1, TIGAR, PRKCD, BAX, MAPK11, PTGS1, BCL2, ADIPOQ, TNF, ADAMTS4, PPARA, EGFR, TNFRSF1B, KEAP1, HIF1A, CYP2C19, IL6, CDK…
L-Glutamic Acid	61	GRIK2, PFAS, GRIK5, BCAT1, OPLAH, GLUL, AADAT, FPGS, GRIK4, GRIN2C, NADSYN1, GRIA2, GRM7, SLC1A6, SLC7A11, CPQ, GRIA4, ASNS, GRM1, SLC1A2, PSAT1, GOT2, GPT2, GAD1, GRIN2B, FOLH1, GCLM, AASS, GLUD1, FTCD, GRIK1, GRIN3A, SLC1A1, GRIA1, DNPEP, GGCX, GRIK3, GLS2, GRIN1, SLC1A7, GLS, ALDH18A1, GRM8, GPT, ENPEP, TAT, EARS2, SLC1A3, EPRS, GRIA3, GRIN2A, GRM4, GRIN2D, ABAT, BCAT2, GMPS, GOT1, GLUD2, NAGS…
Kaempferol	60	MAPK8, CASP3, TXN, SLCO1B1, LYN, MAPK14, HMOX1, PARK7, BIRC2, PLEK, CYP1A1, NFKB1, NSFL1C, CYP1B1, MYLK3, AKT1, BIRC3, PPARG, SELE, BTK, MIR21, MMP1, ITPR3, CDK1, PTGS2, CYP1A2, CLDN2, CXCL8, STAT1, VCAM1, NR1I2, MMP9, BMPR2, TJP1, DIO1, ICAM1, MCU, JUN, BAX, BCL2, HSP90AA1, GSTM1, STAT3, SYK, NOX4, FOXP3, TNF, GSTM2, CYP3A4, CAT, NFKBIA, NR1I3, GPER1, ESRRA, CDK2, AHR, NOS2, NFE2L2, RPS6KA3, XDH
Baicalin	58	CASP3, C10orf10, TYR, MAPK14, IL1B, KDM1A, ALOX5, CYP1A1, EIF2AK2, SCNN1A, NFKB1, PIK3CA, CS, TLR4, ZHX2, SOD1, AKT1, PPARG, IL2, CASP9, HKDC1, SMAD3, PTGS2, SMAD2, CYP1A2, NOD2, GSK3B, TNFRSF11B, MAPK1, FABP1, MMP9, UGT1A1, CYP3A, MEG3, SOST, FN1, NR1H3, METTL3, ADORA2A, BAX, JAK2, BCL2, STAT3, CAMK2G, TNF, FOXP3, TGFB1, MAP2K7, NR3C1, GUSB, FGF2, NEU1, EGFR, DKK1, TLR2, IL6, IL17A, CDKN2A
Capsaicin	58	GAA, TACR1, TGFA, GFAP, TNFRSF11B, NRP1, F2RL1, PRKAA1, CYCS, HSD3B2, GAP43, EPOR, CAT, PGP, AR, UCP1, TACR3, RAC1, HMOX1, ALOX5, ENOX2, TAC1, SPI1, RELA, HSPA4, POMC, NOS1, CREB1, MIR206, FOS, CYP3A4, ABCB1, NFE2L2, CASP3, CALCA, GLUL, CTNNB1, SOD1, VEGFA, PHB2, BCL2, NFKBIA, TRPV1, TRPV2, SIRT1, GATA1, AKT1, TRPA1, MMP1, PTGS2, CYP1A2, MAPK1, HBB, GYPA, JUNB, CDK8, KLK3, CTRC
Vitamin D3	52	CYP19A1, TXN, IGF1, CASR, TGFA, TNFRSF11B, S100G, MMP2, FOXP3, TLR2, DYSF, AR, TG, DHCR7, PTH, RELA, CAMP, IL10, VDR, DBP, IL4, TNFSF11, IL6, CYP24A1, CD86, RXRA, CCR6, NFKB1, TLR4, CD55, CXCL8, REN, CAMKK2, PRL, CYP27B1, NFKBIA, SMO, IGFBP3, GLI1, GJA1, AKT1, CD14, CD40, PTGS2, CYP11A1, MAPK1, MMP9, CCR7, CSRP1, CD80, CD83, MAPK3
Acetaldehyde	49	PENK, SELP, JUN, MYC, MAPK9, MMP2, RARB, RAPGEF4, RYR2, CAT, COL1A2, MAPK8, CCND1, PLAU, RELA, COL1A1, CMA1, PRKCB, POMC, JMJD6, CELF1, MT2A, FOS, CEBPB, AGT, IL6, PPARG, CDK4, FN1, SMAD7, TIMP1, ADIPOQ, OPRK1, NFKBIA, ST6GAL2, HDAC11, SOD2, IL1B, CTSG, TIMP2, MMP1, MMP9, CDT1, PMM2, TGFB1, TNF, MMP11, COL7A1, CTSL
Tanshinone IIA	44	MMP9, MAPK8, CASP3, SELP, AQP1, TP53, RIPK1, NPM1, CDKN1A, IL1A, AQP9, MAPK14, SRC, BMP2, JUN, PTEN, MYC, ITGB3, BAX, BCL2, MAPK11, ECE1, CRP, TLR4, RELA, NOS3, AQP8, TNF, AKT1, SKP2, EDN1, FASN, AQP3, FOS, CALCR, CYP3A4, EDNRA, TNFRSF9, CYP1A2, IL6, NFKBIA, MAPK1, NR1I2, NFE2L2
Calycosin	42	CASP3, NQO1, PTGR1, IL1B, HMOX1, BATF2, , PCNA, PIK3CA, PIK3CD, SNAI2, AKT1, GABPA, PPARG, VIM, SMAD3, SMAD2, CXCL8, WDR7, SERPINE1, MAPK1, SRC, SQSTM1, BAX, BCL2, IL25, STAT3, TGFB1, COL11A2, PIK3R1, PIK3CB, EGFR, MAPK3, KEAP1, AGT, HIF1A, IL6, ABCB1, GPER1, ESR1, PIK3CG, NFE2L2
Oleic Acid	40	SLC2A2, STAT5B, GLP1R, PON1, GCG, SERPINE1, LALBA, DNPEP, GAP43, HMGCR, BDNF, MPO, CRP, MSI1, INS, PAM, FABP1, PLG, EDN1, STAT5A, AQP9, MMP13, PPARG, FABP5, MMP3, CCK, PRSS1, BCL2, CETP, NTRK2, NOS2, UCP2, ERBB2, PDX1, SOAT1, AQP3, RBP2, PPARA, UCP3, PPARD
Chelerythrine	38	CASP3, PRRT2, SLC1A6, PRKCA, HMOX1, MST1, IL1B, PRKCG, CYP1A1, MYC, PRKCD, NFKB1, MSH2, AKR1B1, BCL2, GRIN2A, MSH6, NPPC, TRNG, GUSB, EDN1, CDC42BPA, VEGFA, SDHB, PTGS2, PRKCB, HIF1A, AGT, G6PD, SLC9A3, CXCL1, MAOA, FCAMR, KCNJ11, MAPK1, ACHE, NFE2L2, CA9
Paeoniflorin	37	MAPK8, PRKAA2, MMP9, PRKAB1, PRKAA1, NEDD4L, IL1B, MAPK14, APP, ICAM1, IRAK1, MITF, NFKB1, IGF1, MIR29B1, CREB1, STAT3, NOX4, TYRP1, CYBB, TNF, AKT1, BGLAP, CD14, VEGFA, SNCA, SOCS3, PTGS2, HSPA4, HIF1A, IL6, SHH, ABCB1, STK11, LBP, MAP3K5, MAPK1
Salvianolic Acid A	35	MMP9, CASP3, MTOR, CDKN1A, MAPK14, HMOX1, DCX, FOXO3, CCNE1, ALOX5, CDK5, CCND1, CTNNB1, NFKB1, IKBKB, PIK3CA, CDKN1B, COMT, BCL2, PIK3CD, BCL2L11, TAGLN, TNF, BDNF, AKT1, PPARG, COL7A1, PIK3CB, CDK5R1, PTGS2, IL6, GSK3B, NOS2, PIK3CG, NFE2L2
4-Aminobutyric Acid	34	SLC2A2, GABARAP, GABRA3, SLC32A1, GABRB2, GABBR1, GABRG3, BDNF, GABRD, AR, GABRA4, GATM, GABRB3, SLC6A11, MGAT1, GABRP, GABRA5, GABRE, GABBR2, IL6, CHAT, CASP3, ABAT, GABRQ, GABRA6, GABRG1, BCL2, GAD1, GABRA2, PDX1, GABRA1, GCK, GABRB1, GABRG2
Naringenin	34	CYP19A1, CASP3, LDLR, AKR1C1, GSR, RELA, SOAT1, SOD1, AKT1, PPARG, NPPA, BAD, NPPB, NR3C2, MTTP, GSTP1, APOB, SOAT2, BCHE, SREBF1, BCL2, ADIPOQ, ABCC1, HMGCR, PPARA, FASN, CES1, ESR2, MAPK3, CAT, PLA2G1B, PKD2, ESR1, NOS2
[(2R,3S,4R,5R)-5-(2-Amino-6-Oxo-3H-Purin-9-Yl)-3,4-Dihydroxyoxolan-2-Yl]Methyl Dihydrogen Phosphate	33	HMGB1, APOE, FOXP3, BDNF, CAT, MIRLET7B, TLR3, TLR9, SNCA, TRPC6, MIR125B1, SLC1A2, CA1, REG1A, DNMT3B, TNFRSF4, IL2RA, OXTR, TNFRSF13B, MBD2, BCL2, ESR1, ERBB2, OSR2, MIR663A, SOCS3, HLA-G, CXCL14, TTR, SALL3, CXCR4, CXCR1, AHR
RUTIN	33	CASP3, S100A8, MAPK14, P4HB, PPARG, PPARGC1A, TFAM, FN1, BCL2, HMGCR, STAT4, FAS, CAT, CBR1, UCP1, MAPK8, MTOR, MPO, IL1B, SIRT1, IFNG, INS, CXCL1, BACE1, ADA, MARK4, ACTA2, TNF, TGFB1, NR1H4, AKR1C3, IL6, PROCR
Cryptotanshinone	32	MMP9, GLIS3, CASP3, OLR1, BID, UGT1A3, NFKB1, IKBKB, PTPN11, BAX, AKR1B1, CYP17A1, RELA, STAT3, PAX5, NOX4, TGFB1, PARP1, PIGK, AKT2, CASP9, MCL1, S100B, UGT1A7, PTGS2, GFAP, SMAD2, CASP7, DNM1L, ALDH1A1, NOS2, ACHE
Gallic Acid	32	CASP3, TP53, P2RX7, PTGR1, IL33, VTN, NFKB1, F2, CASP9, MGST1, SNCA, LPO, DPP4, MAOA, MMP9, BACE1, MARK4, SULT1A1, MMP2, PRKCD, DGAT1, CDC25A, RAB13, CAT, ABCB1, FASLG, MYD88, ACE2, ACHE, NOS2, PIK3CG, NFE2L2
Isoliquiritigenin	31	MMP9, MAPK8, MIR301B, HMGB1, NLRP3, TYR, IL1B, SRC, MIR374A, PTEN, NFKB1, MMP2, BAX, JAK2, CTTN, TGFB1, AKT1, FGF2, CISD1, GUSB, SELE, HSPA5, PTK2, VEGFA, SYT1, FOS, EGFR, LRIG1, VCAM1, CDK2, NFE2L2
(E,Z)-Farnesol	28	CD86, PIK3CA, PIK3CD, FN1, RSAD2, STK25, CDH2, PIK3CG, MTOR, CDH1, TWIST1, CCL3, AKT1, VIM, JAK1, NRG1, CD1A, PTPN11, JAK2, STAT3, TNF, SNAI1, PIK3R1, CD80, CSF2, PIK3CB, CD83, OCLN
Sinomenine	27	NLRP1, CRYAB, EGF, IL18, CD274, OSCAR, IL1B, PDCD1LG2, NFKB1, PTGS1, STAT3, TNF, IFNG, DRD2, IL2, NFATC1, FOS, PGF, PTGS2, KEAP1, MMP3, DAXX, IL6, CXCL8, HSPB1, CXCR1, NFE2L2
Rhein	26	CASP3, DNMT3A, RAC1, MSR1, IL1B, IKBKB, TLR4, DNMT1, PARP1, GLP1R, PPARG, KL, ALKBH1, MMP9, JUN, BAX, FTO, BCL2, CASP1, STAT3, TNF, KRT14, EGFR, IL6, UCP1, DDIT3
Salvianolic Acid B	26	TNF, SIRT1, LAMP1, GJA1, AKT1, NQO1, CD86, PPARG, NLRP3, IL10, CD40, MAPK14, HMOX1, CD1A, SRC, PIK3CB, IL12B, SNCA, IL12A, , HIF1A, PIK3CA, PIK3CD, TLR4, PIK3CG, NFE2L2
Caffeic Acid	25	CYP2C9, SELP, RAC1, HMOX1, ALOX5, CYP1A1, BCHE, CTSC, KCNN4, NFKB1, PTGS1, TLR4, TOP1, TNF, CYP2D6, CYP3A4, MAPK3, GFAP, PTGS2, PRKCB, CYP1A2, CYP2C19, MAPK1, ACHE, NFE2L2
Piceid	24	TNF, SIRT1, PARP1, LDLR, MIR200A, RYR2, CALM3, VEGFA, PKM, IL1B, SLC5A1, SIRT3, ICAM1, CDK5, KEAP1, GCK, G6PD, BAX, SLC5A2, STAT3, NOS2, NFE2L2, PCSK9, XDH
PAEONOL	24	MTOR, TYR, IL1B, IKBKB, MAOB, RELA, GSK3A, AKT1, PBK, IL2, MIR21, PTGS2, MAOA, MAPK1, TNNI3, ICAM1, PTEN, BAX, BCL2, TNF, NOTCH1, PPARA, MIR30A, NFKBIA
Glycine	24	ALAS1, GLRB, GLYAT, AGXT, GARS, GCAT, GSS, GPR18, AGXT2, ALAS2, GNMT, GRIN2C, GLYATL1, GATM, GLRA1, GLRA3, GRIN2A, SHMT1, GLRA2, PIPOX, GLYATL2, BAAT, SHMT2, GRIN3B
Aloe-Emodin	23	MMP9, CASP3, TP53, TYR, CDKN1A, PRKCA, CCNB1, IL1B, PRKCE, IRF4, PCNA, CCNA2, MYC, PRKCD, BAX, SLC22A8, TNF, FASN, CDK1, CRTC2, CDK2, ESR1, SLC22A6
Isorhamnetin	23	MAPK8, CASP3, OLR1, SLCO1B1, MAP2K1, CCNB1, MAPK14, WEE1, SLC47A1, NCF1, CASP8, CAMK2G, TNF, AKT1, PARP1, MAP2K7, PPARG, EGFR, PTGS2, CSK, CRMP1, NOS2, XDH
Rosmarinic Acid	23	C3, F2, CASP3, CD86, CCL2, IL2, IL4, PREP, C5, CD80, OLIG2, ABAT, IDO1, IL6, CCR3, NFKB1, IKBKB, STAT1, AURKA, RPS6KB1, CCL3, CCL11, IL5
Cyanidin	22	TNF, CASP3, PARP1, AKT1, RAF1, CASP9, MAP2K1, PPARA, UGT1A, SIRT3, NR1H2, PTGS2, ADAMTS5, IL6, NFKB1, CXCL8, IL17RA, MMP13, MAPK1, IL17A, MAP2K4, NOS2
Beta-Carotene	22	CEBPA, CASP9, MYC, MMP2, MMP10, HMOX1, CASP8, CYP3A4, ALB, CASP3, RXRA, F3, CTNNB1, CAV1, VEGFA, BCL2, GJA1, AKT1, MMP1, PTGS2, CYP1A2, CASP7
Lupeol	22	LAMP1, CASP3, CATSPER1, AKR1B1, TIPARP, PLK1, IFNG, VEGFA, CDC25C, CDK1, PTGS2, MMP9, SGK1, BCL2, STAT3, PRF1, KLK3, EGFR, IL6, AR, ESR1, SFN
Palmitic Acid	21	APOM, LALBA, IL1A, RHO, PPT1, IDE, PAEP, ABHD15, CRTC2, TRAPPC3, YWHAZ, HNF4G, IL10, TNF, PPARA, GUCA2A, CYP2C8, TLR2, PMP2, PTEN, BCL2
L-Aspartic Acid	21	ASPA, SLC25A13, DARS, SLC1A1, MPO, ASPH, PAICS, ASS1, LAT, ADSSL1, ADSS, ASNS, RNASE1, LYZ, SLC25A12, ACY1, GOT2, ASRGL1, GOT1, TRPV6, DARS2
(-)-Epigallocatechin	20	GAA, CASP3, CYP3A, RYR1, CCL2, PLAU, SULT1A1, TLR4, DNMT1, NOTCH1, PPARG, HSPA5, FASN, ELANE, EGFR, CBR1, CXCL8, ABCB1, G3BP1, MME
Higenamine	20	CASP3, HMOX1, ADORA2A, PIK3CA, BAX, ATP6V0A2, BCL2, PIK3CD, AKT1, CASP9, PIK3R1, ADRB2, PIK3CB, EGFR, MAPK3, ARRB1, ARRB2, MAPK1, PIK3CG, NOS2
Nicotinamide	19	MCL1, SIRT3, UBE3A, BST1, LDHA, PTGDS, SARM1, KDM1A, SIRT5, CEBPE, SIRT1, PARP1, BHMT, RAF1, TDO2, ADIPOQ, CD38, MAPK1, MAPK3
Dibutyl Phthalate	19	SLC2A2, MYC, HIF1A, NR1I3, BID, INS, CASP3, FSHR, BCL2, CYP17A1, ESR2, TRPV1, ESR1, AKT1, VIM, CYP11A1, MAPK1, MAPK3, AHR
Coumarin	17	CASP3, AKR1C1, BCL2L1, GGT5, GSTP1, GSTA2, BAX, BCL2, STAT3, GCLC, PPARA, KRAS, CYP3A4, PTGS2, CYP2A6, IL6, XDH
Sucrose	17	ACTA1, GPBAR1, CALR, RTCB, VWF, APOA1, CRP, LYZ, SLC5A1, DRD3, CASP3, TAS1R2, ATOX1, CCL22, GMPPB, HSP90AA1, KCNJ2
Nicotinic Acid	17	DGAT2, HCAR2, NNMT, LIPG, SIRT1, LPL, HP, HIF1A, APOB, MAGEC3, MAPK14, QPRT, ADIPOQ, NOS3, CETP, TRPV1, HCAR3
Ferulic Acid	16	CYP2C9, ENO2, PRKAA1, MAP2K1, APP, PVALB, CTNNB1, BCHE, PEA15, MAP2K2, PRDX2, HPCA, CXCL8, MAOA, ACHE, NFE2L2
Citral	16	CPD, TNF, AKT1, CCL2, PPARG, CYP2B6, IL1B, FAS, MARK4, ALDH1A2, IL6, ALDH1A3, NFKBIA, SREBF1, RELA, CASP1
Choline	16	PHOSPHO1, MAPK14, BCHE, CHRFAM7A, SIGMAR1, CHRNA4, PLD1, ACHE, PCYT1B, HMOX1, CHRNA7, PEMT, PLD2, TNF, VEGFC, PCYT1A
3,4-Dihydroxybenzoate	15	CASP3, MTOR, IL1B, PARK7, NFKB1, MMP2, BAX, BCL2, CASP8, AKT1, CASP9, IL10, , RHOB, NFE2L2
Vanillin	15	SLC2A4, FLT3, MAPK14, TRPA1, PPARG, TRPV3, MAPK1, MMP9, CYCS, MARK4, JUN, BAX, PRKDC, APAF1, TRPV1
Evodiamine	14	CEBPA, TLR2, TLR3, SRC, CREB1, IL6, IL1A, TLR4, TRPV1, MAPK1, JAK2, STAT3, TNF, MAPK3
Linoleic Acid	14	CCL2, NPPB, JUN, NPPA, POMC, ICAM1, FOS, LCN2, NFKB1, SCD, BCL2, PLA2G7, PPARA, NFATC4
CHLOROGENIC ACID	14	MAPK8, GAA, NOTCH1, TLR2, BCHE, PPARG, NFKB1, IRAK4, BCL2, VEGFA, MAPK1, ACHE, NEU1, HDC
Imatinib	14	MCL1, DDR2, PARP14, PARP9, CSF1R, NTRK1, IFNG, DDR1, PDGFRA, KIT, STAT1, ABL1, PDGFRB, BCR
Betulin	14	MAPK8, PRKAA2, IL1B, SIRT1, IFNG, PTGS2, TNF, PRKAA1, SREBF1, IL6, MMP3, STK11, PRKAB1, MAPK1
Carnosol	13	SIRT1, TGFB1, EZH2, ALOX5, NCOA3, CCL4, FUT1, NCOA1, PTGES, NR1I2, NFE2L2, NCOA2, ITK
D-Limonene	13	CASP3, NFKB1, CASP9, ALDH3A1, ADORA2A, BCL2, TP53, IL1B, MPO, INS, NPY, BAX, FGB
Curcumol	13	POSTN, CYP2C19, NFKB1, MKI67, BAX, JAK2, NCL, BCL2, CREB1, HOTAIR, MAPK14, JAK3, EZH2
Pristimerin	13	MAPK8, CASP3, MGLL, PARP1, VEGFA, NKX3-1, AIFM1, BAX, ANXA5, BCL2, CD44, PROM1, NUP62
Lauric Acid	13	LY96, HNF4A, PLA2G2D, ADH5, GCG, VLDLR, PLA2G2A, C8G, TLR4, GM2A, PPARA, LTF, GLTP
Adenine	13	ACACB, MTAP, ADA, AHCYL1, FGF23, APRT, HAMP, PRKAA1, PPID, ACP1, PECR, SRPK2, MTOR
Dihydrotanshinone I	13	TGFB1, CTGF, BIRC5, HIF1A, CDK4, COL1A1, MMP2, ACTA2, YAP1, SOX4, ACHE, TEAD2, NFE2L2
Eucalyptol	12	IFNG, TNF, TRPA1, TRPM8, NLRP3, IL1B, MPO, IL6, TRPV1, AHR, ACHE, IL5
Betaine	12	IGFBP1, LIPE, PPP2CA, MECP2, PPARG, SLC6A12, CHDH, FGF21, GLO1, BHMT, TNF, PPARA
Danshensu	12	GCLM, CASP3, TNNI3, HMOX1, BAX, BCL2, AKT1, GCLC, KEAP1, CYP1A2, HRAS, NFE2L2
Benzene	12	CD86, TP53, HMOX1, DNMT3B, CYP2E1, CXADR, NR1I2, GSTK1, SSTR5, FURIN, CD80, ACHE
17654-19-2	12	MTOR, NLRP3, NFKB1, TGM2, IFNG, AKT1, IL2, ICMT, MAP2K7, PPARA, PKD2, NFE2L2
2,6-Di-Tert-Butyl-4-Methylphenol	11	KDR, PSME1, LBP, ADIPOR2, SFTPB, UCP1, HMOX1, EIF2AK2, ICAM1, BMP4, PECAM1
Corosolic Acid	11	MAPK8, NLRP3, EIF2AK3, CTNNB1, NSFL1C, CYBB, DNM1L, ERN1, GPBAR1, PTK2, DDIT3
Eugenol	11	MAOB, CYP1B1, ABCC2, PTGS2, TRPV3, MAOA, ANO1, ESR2, AR, ESR1, NOS2
(-)-Epicatechin	11	TNF, CASP3, RYR1, ACE, ABCG2, IL1A, GSS, JUN, IL6, COMT, NOS3
TAXIFOLIN	11	TOP2A, CYP1A1, TREM2, ACE, HSD11B2, APOE, SRD5A1, SRC, PIK3CB, AHR, EGFR
STIGMASTEROL	11	ABCB11, APP, TLR4, AKT1, ABCC2, BACE1, NR1H3, NR1H2, NR1H4, ABCG5, ABCG8
6-Shogaol	11	BCL2L1, NFKB1, PDE4D, PPARG, BAX, BCL2, PIK3C3, FASN, FASLG, EIF2S1, DDIT3
Niloticin	10	IL1B, NFKB1, RELA, TLR4, LY96, COX2, ISYNA1, TNF, IL6, MYD88
Tanshinone I	10	CYP2C9, CYP2C8, VEGFA, CYP3A4, ICAM1, CYP2E1, CYP1A2, NFKB1, VCAM1, SYK
BETA-SITOSTEROL	10	CASP3, PRKCA, CASP9, MAP2, PRKAA2, BCL2, CASP8, BAX, TGFB1, EDN1
Betulinic Acid	10	LIPG, NFKB1, GPBAR1, YY1, MAPK8, TP53, ERBB2, LMNB1, MAPK1, STAT3
Coptisine	10	MMP9, IDO1, TIMP1, NLRP3, MAOA, DHODH, POU2F2, CASP1, MAPK1, SLC22A1
Formononetin	9	CASP3, NLRP3, PTGR1, USP5, SIRT1, AKT1, ESR2, FGFR2, ABCB1
Stearic Acid	9	PLA2G2D, CPT1B, HDAC6, CDK1, PTPN1, PPARA, ABCB1, ENPP7, MAPK1
Germacrone	9	CASP9, BAX, CASP3, HSPA5, BCL2, MTOR, AKT1, STAT3, CASP7
Adenosine	9	NDUFS3, CYTB, ADORA2A, ADORA2B, TOMM22, ATP5D, ADORA3, ADORA1, TOMM70A
Crocin	9	ABL1, CASP3, OLR1, IL6, VEGFA, ESR1, MAPK1, SMPD2, MAPK3
SCHEMBL18827263	9	AKT1, MTOR, PIK3R1, TCEAL1, CCNB1, CDC25C, CDK1, TPT1, H3F3AP6
L-Asparagine	9	ASNS, SLC38A3, SLC38A1, ASRGL1, SLC38A2, NARS2, NARS, SLC38A4, SLC1A5
DIOSGENIN	8	PLA2G4A, SOD1, AKT1, MTOR, FASN, VEGFA, CAT, UHRF1
Isradipine	8	CACNA2D2, CACNA1H, CACNB2, CACNA1D, CACNA1F, CACNA1C, CACNA1S, CACNA2D1
Acitretin	8	RXRA, RBP1, RARB, RXRB, RARG, RARA, STAT3, RXRG
Aucubin	8	TNF, MTOR, MPO, IL6, NFKBIA, BAX, BCL2, RELA
(2S)-2-[[4-[(2-Amino-4-Oxo-1H-Pteridin-6-Yl)Methylamino]Benzoyl]Amino]Pentanedioic Acid	8	FOLR2, FOLR1, IGF2, CASP3, HSD11B2, FOLR3, SFTPA1, FOLH1
(1S,2S,4S,6R,8S,9S,12R,13R)-5',7,9,13-Tetramethylspiro[5-Oxapentacyclo[10.8.0.02,9.04,8.013,18]Icos-18-Ene-6,2'-Oxane]-16-Ol	8	TNFRSF10B, MAPK14, MAPK3, PTGS2, PDCD1, RPL17, RPL17-C18orf32, MAPK1
CARVACROL	8	SLC6A3, TRPV3, UGT1A9, TRPM7, TRPV1, AKT1, NLN, AXL
Hyperoside	8	UGT1A1, SIRT1, CASP3, EPHB1, HMOX1, EDNRA, CAT, NFE2L2
Solamargine	7	PSG1, AKT1, PTGER4, NFKB1, BAX, BCL2, RELA
Loganin	7	PARK2, PINK1, BCHE, BACE1, NUP62, ACHE, OPTN
Chrysoeriol	7	KDR, CCNB1, CYP1A1, VTN, MET, CYP1B1, ACE2
(2E,4E)-Deca-2,4-Dienal	7	F3, CCND1, RB1, CDKN1B, TNF, CDK4, CD36
(2R,3R,4S,5S,6R)-2-[[(1S,3R,6S,8S,9S,11S,12S,14S,15R,16R)-14-Hydroxy-15-[(2R,5S)-5-(2-Hydroxypropan-2-Yl)-2-Methyloxolan-2-Yl]-7,7,12,16-Tetramethyl-6-[(2S,3R,4S,5R)-3,4,5-Trihydroxyoxan-2-Yl]Oxy-9-Pentacyclo[9.7.0.01,3.03,8.012,16]Octadecanyl]Oxy]-6-(Hydroxymethyl)Oxane-3,4,5-Triol	7	CD276, ABCG2, MMP1, SOX2, MAPK3, ABCB1, CRTC1
Vanillic Acid	7	PPARG, TYR, CEBPA, CA3, HIF1A, NOS3, TYRP1
GERANIOL	7	BAK1, CDK4, CES2, HMGCR, CDK2, CYP2B6, CCND1
Wogonoside	6	MAPK8, MAP2K5, PLSCR1, TRAF2, ERN1, MAP3K5
(1R)-1,6,6-Trimethyl-1,2,6,7,8,9-Hexahydrophenanthro[1,2-B]Furan-10,11(3aH,11aH)-Dione	6	TNF, EDN1, APP, CCND1, BIRC5, STAT3
Riboflavin	6	RBP4, HSPB1, RIT1, CYP3A4, RFK, BLVRB
Succinic Acid	6	SUCNR1, ZEB1, MMP3, ALDH5A1, CTBP1, CASP3
Miltirone	6	CASP3, BCL2, PARP1, IQGAP2, BAX, NCOA2
QUINOLINE	6	MIF, MTOR, BRD4, NQO2, CEL, PTGS2
Crocetin	6	ACHE, BAX, CASP3, KISS1, VCAM1, TYR
Astilbin	6	TNF, IFNG, IL6, TXNIP, IL10, IL1B
Hydroquinone	6	CYSLTR1, GRM1, ITGB3, TYR, ITGA2B, TNF
Ethinyl Estradiol	5	BDNF, ESR1, TH, HPSE, NR1I2
(-)-Borneol	5	VEGFA, TJP1, TRPM8, MMP9, UGT1A6
Tomatidine	5	MAPK8, TRAF6, AKT1, MAPK14, NFKB1
Ar-Turmerone	5	NFKB1, PPARG, MAPK8, PTGS2, MAPK1
Astragalin	5	MMP9, AKT1, VEGFA, ZEB1, MAPK1
L-Methionine	5	BHMT2, METAP2, MTR, MTRR, BHMT
OLEANOLIC ACID	5	CASP3, CASP9, NQO1, HMOX1, ICAM1
Salvianolic Acid B	5	MMP9, ALDH7A1, COMT, PTGS2, P2RY12
Phenol	5	ALB, ACE, MB, AGTR2, STAT3
Guanidine	5	RNASE1, DLG4, GAMT, NISCH, ALDH2
Cis-Jasmone	5	AHSA1, BAX, CASP3, CDKN1A, TNFRSF1A
L-Lysine	5	SLC7A1, KARS, SLC7A2, SLC7A3, SLC7A4
Albiflorin	5	PRKAA2, PRKAB1, PRKAA1, AKT1, PIK3R1
Indole	4	PKLR, KRAS, IFNG, MAOA
Atractylenolide III	4	CASP3, CASP9, BAX, BCL2
Isoquercitrin	4	PPARG, PRKAA1, CYP1A1, P4HB
Panduratin A	4	PRKAA2, NFKB1, PPARA, STK11
Atractylodin	4	TNF, NAAA, IL1A, IL6
Phenethylamine	4	CNR1, HTR2A, CNR2, PPARA
HEXANAL	4	TNF, JUN, CD36, F3
Chrysophanol	4	P2RX7, PARP1, ACTA1, NKD2
D-CAMPHOR	4	TRPV3, TRPV1, TRPA1, TRPM8
Isoimperatorin	4	CASP3, PTGS2, CASP8, CASP9
METHYL PALMITATE	4	IL10, PTGS2, TNF, IL6
Sennoside A	4	GCG, FFAR2, FFAR3, AQP3
(-)-Borneol	4	VEGFA, TJP1, TRPM8, MMP9
(+)-Borneol	4	VEGFA, TJP1, TRPM8, MMP9
BETA-ELEMENE	4	NFKB1, HULC, AKT1, MMP9
Worenine	4	TNF, MAPK8, IL6, MAPK9
(1S,5R,8R)-2-Methyl-6-Methylidene-9-Propan-2-Yl-11-Oxatricyclo[6.2.1.01,5]Undecan-8-Ol	4	RIPK1, MAPK8, MAPK9, RIPK3
L-Tyrosine	4	YARS, TAT, TH, YARS2
(+/-)-Eriodictyol	4	TBK1, NQO1, HMOX1, NFE2L2
Tricin	4	SULT1E1, TYR, PTGS1, PTGS2
(+)-Catechin	4	PPARG, FASN, DHFR, KLF7
Protopine	4	BCL2, DRD2, MCL1, CDK1
Neferine	3	MTOR, RPS6KB1, NFE2L2
Jatrorrhizine	3	SLC22A2, MAOB, MAOA
Dihydrocapsaicin	3	GAA, TRPM8, TRPV1
Rhapontigenin	3	MAPK1, JUN, HIF1A
Demethoxycurcumin	3	PPARG, ABCB1, HSD3B1
2-PHENYLETHANOL	3	BAX, STAT3, PPARA
Palmatine	3	CYP3A4, CYP2E1, TH
Crotonoside	3	HDAC6, HDAC3, FLT3
ETHYL ACETATE	3	MPO, TNF, NEU1
NONANE	3	TNF, IL1A, CCL2
Inositol	3	ISYNA1, IMPA1, MIOX
Pinostrobin	3	FOXO3, PCSK9, AR
Beta-Cryptoxanthin	3	RARA, RUNX1, ABCA1
L-Tryptophan	3	IDO1, WARS2, WARS
L-Valine	3	BCAT1, PCCB, VARS
(-)-Limonene	3	HMGCR, IFNG, IL4
Bisdemethoxycurcumin	3	HSD3B1, NR1I2, DNMT1
Phellodendrine	3	CYP2C9, CYP3A4, CYP1A2
Uridine	3	TP53, TYMP, TLR8
Camphor	3	CYP1A1, TRPA1, TRPV3
Octopamine	3	ADRB1, ADRB2, ADRB3
Linalool	3	SOD2, PPARA, NPY
D-Thyroxine	3	THRB, THRA, TPO
Alpha-Spinasterol	3	NR1H3, NR1H2, TRPV1
Benzoic Acid	3	SLC15A1, RAB9A, DAO
Benzoylpaeoniflorin	3	PTGS1, COX2, NFKB1
Soyasaponin I	2	CDH1, REN
Berberrubine	2	POU2F2, SLC22A1
NCIMech_000700	2	PTGS2, NOS2
L-Proline	2	PPIB, PPIA
Byakangelicin	2	NR1I2, CYP3A4
Humulene	2	IL1B, TNF
Syringin	2	TRAF6, HSPA4
(3R,6E)-Nerolidol	2	TNF, TLR4
Ferruginol	2	CD1A, CD83
(+)-Terpinen-4-Ol	2	TP53, MPO
Alpha-D-Galactose	2	TLR4, MIR148A
THYMOL	2	BAX, ELANE
O-Cresol	2	PTGS2, PTGS1
Folic Acid	2	SLC46A1, SLC19A1
Obacunone	2	GPBAR1, CYP3A4
Lactic Acid	2	NR2C2, AHR
Columbamine	2	POU2F2, SLC22A1
Angelicin	2	CYP1A1, ESR1
Trans-2-Nonenal	2	PTP4A1, ELANE
L-Cystine	2	SLC7A11, CTNS
MENTHOL	2	TRPA1, TRPM8
Suberosin	2	NFATC3, RELA
Tetrahydropalmatine	2	DRD2, ABCB1
Liensinine	2	P4HB, ERG
Tetradecanoic Acid	2	DGKD, SIGMAR1
CHEMBL227130	2	NOS2, NFKB1
3-Carene	2	SPP1, COL1A1
Octanoic Acid	2	FABP1, ISYNA1
Dimethyl Fumarate	2	RELA, KEAP1
Myrtenal	2	VN1R1, ACHE
3,4-DIHYDROXYBENZOIC ACID	2	AKT1, MGAM
PHILLYGENIN	2	EIF2A, EIF2AK2
(-)-Alpha-Terpineol	2	IL6, ACHE
Lignoceric Acid	2	DUOX2, NCF1
(+)-Menthol	2	TRPM8, TRPV1
Chelerythrine Hydroxide	2	MAP1LC3A, BECN1
Pyrogallol	2	FCER1A, NOS2
NONANOIC ACID	2	ISYNA1, OR51E1
Isoeugenol	2	RELA, IL2
L-Threonine	2	TARS2, TARS
Salsalate	2	PTGS2, PTGS1
Dauricine	1	CASP3
Albiflorin	1	BDNF
Zeaxanthin	1	VEGFA
METHYLEUGENOL	1	HDAC1
BENZYL BENZOATE	1	LIPE
(+)-Gallocatechin	1	MMP9
Nodakenin	1	ACHE
Auraptene	1	AKT1
Citronellol	1	PTGS2
Zingiberene	1	NUP62
Dictamnine	1	HIF1A
Isoferulic Acid	1	ADRA1A
LINAMARIN	1	BNIP3
Phellopterin	1	NEU1
(1S,3R,6S,8S,9S,11S,12S,14S,15R,16R)-15-[(2R,5S)-5-(2-Hydroxypropan-2-Yl)-2-Methyloxolan-2-Yl]-7,7,12,16-Tetramethylpentacyclo[9.7.0.01,3.03,8.012,16]Octadecane-6,9,14-Triol	1	MAPK3
Oxalic Acid	1	GSTM1
Benzaldehyde	1	AOX1
ETHYL PALMITATE	1	AGT
D-Mannitol	1	SLC5A1
3-Hydroxy-4-Methoxybenzaldehyde	1	AOX1
Methyl Rosmarinate	1	RPS6KB1
Guaiol	1	RAD51
Chloramphenicol	1	CD55
Graveolone	1	SNAI1
Epi-Sarsasapogenin	1	PTGS2
Isochlorogenic Acid B	1	NEU1
Norathyriol	1	PTPN1
Strictinin	1	STAT3
LINALYL ACETATE	1	CYP3A4
(E)-2-Epi-Beta-Caryophyllene	1	CNR2
Albiflorin	1	BDNF
Limonin	1	CYP3A4
Scopolin	1	SIRT1
L-Alanine	1	ABAT
3,4-Dihydroxybenzaldehyde	1	ODC1
1-TETRADECANOL	1	TYR
4-Carvomenthenol	1	NFKB1
4-HYDROXYBENZOIC ACID	1	HDAC6
Isochlorogenic Acid C	1	NEU1
Solasonine	1	TFAP2A
Borneol	1	TRPM8
Guaiacol	1	ALB
Rhoifolin	1	EEF2K
D-Citronellol	1	PTGS2
Beta-Eudesmol	1	TRPA1
(-)-Alpha-Pinene	1	NFKB1
Tetradecane	1	TNF
1700908	1	SOD1
Methanol	1	CYP1A1
Astragaloside A	1	TP53
Caryophyllene	1	RELA
Nodakenetin	1	NFKBIA
Nomilin	1	NFKBIA
1-Octanol	1	TRPA1
Physcion	1	PGD
NONIVAMIDE	1	TRPV1
L-Stepholidine	1	DRD1
Poriferasterol	1	NR1H2
QSPL 173	1	NR1H2
Xanthatin	1	KDR
Isocryptotanshinone	1	STAT3
Biphenyl	1	CXCR4
HEPTADECANE	1	NFKB1
